# Supplementary material
Source: ML conference proceedings conference paper supplement (https://proceedings.mlr.press/v151/panaganti22a.html)
Supplement: Supplementary file 1 [file panaganti22a-supp.zip]

~~non-robust~~ ~~optimal~~ ~~robust~~ ~~optimal~~ ~~robust,  $N=100$~~  ~~robust,  $N=500$~~  ~~robust,  $N=3000$~~
