# Supplementary material
Source: ML conference proceedings conference paper supplement (https://proceedings.mlr.press/v151/panaganti22a.html)

# TV uncertainty set

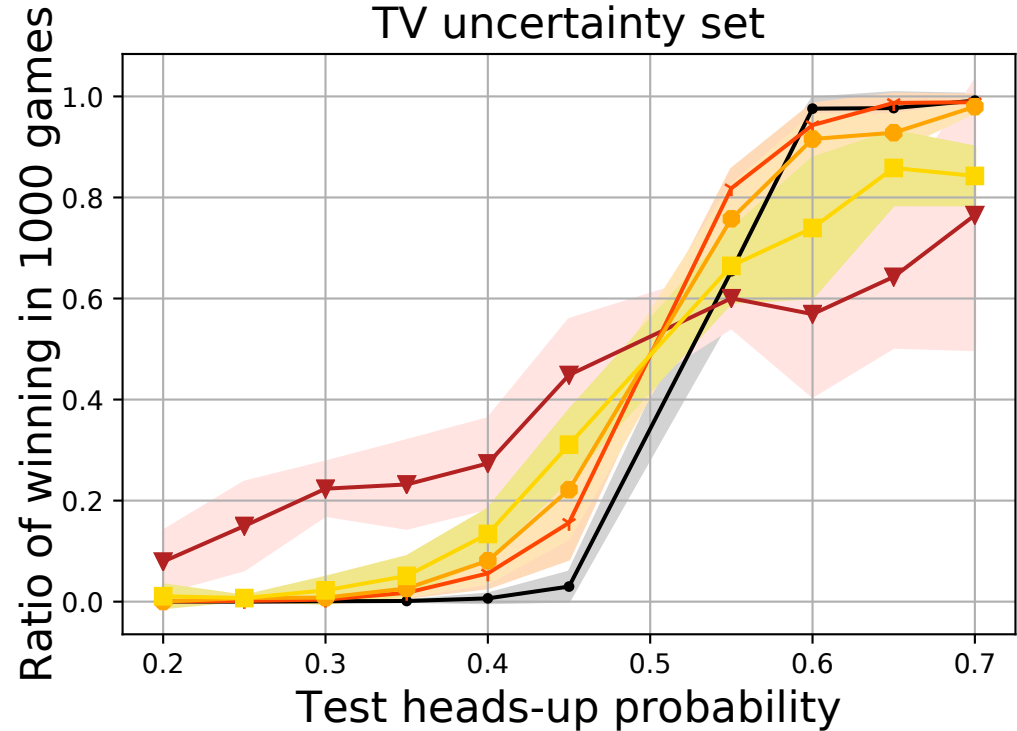

Supplement: Supplementary file 2 [file panaganti22a-supp.zip]

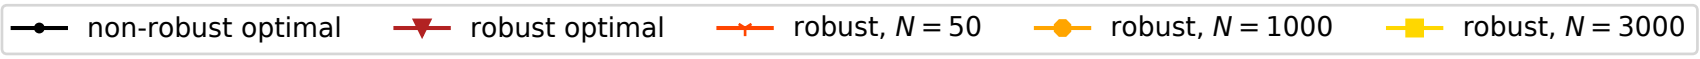

Supplement: Supplementary file 4 [file panaganti22a-supp.zip]

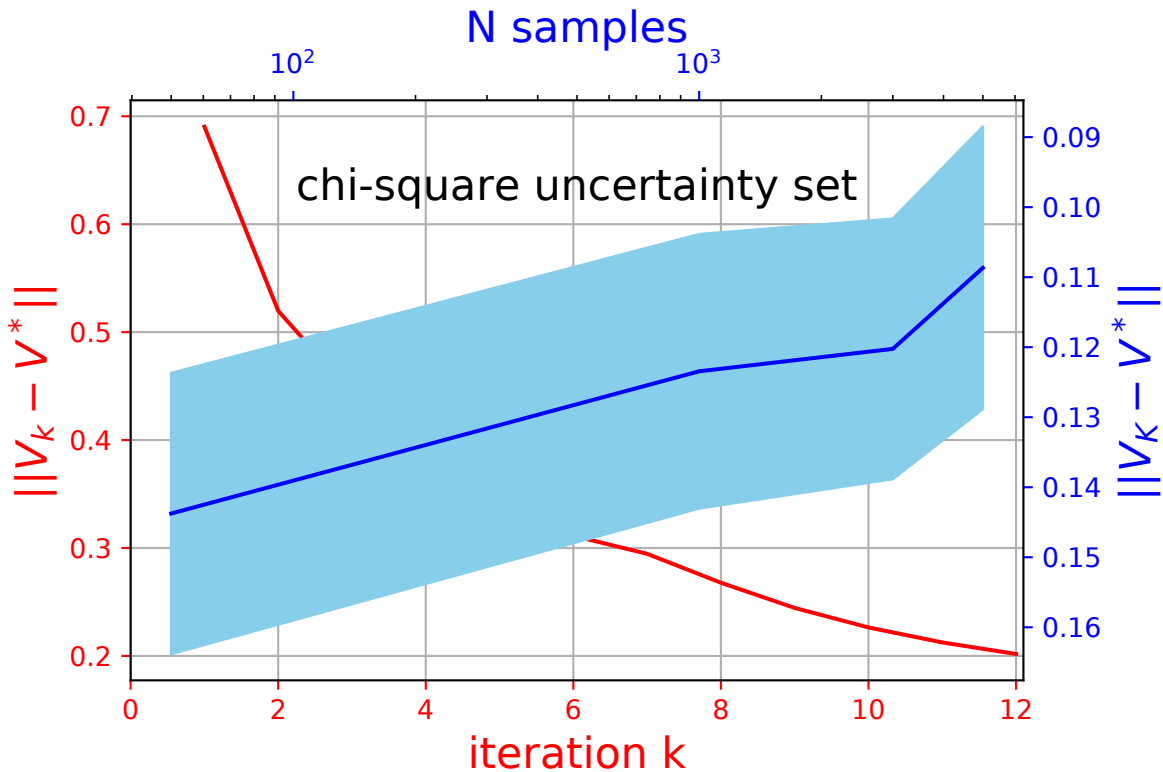

Supplement: Supplementary file 5 [file panaganti22a-supp.zip]

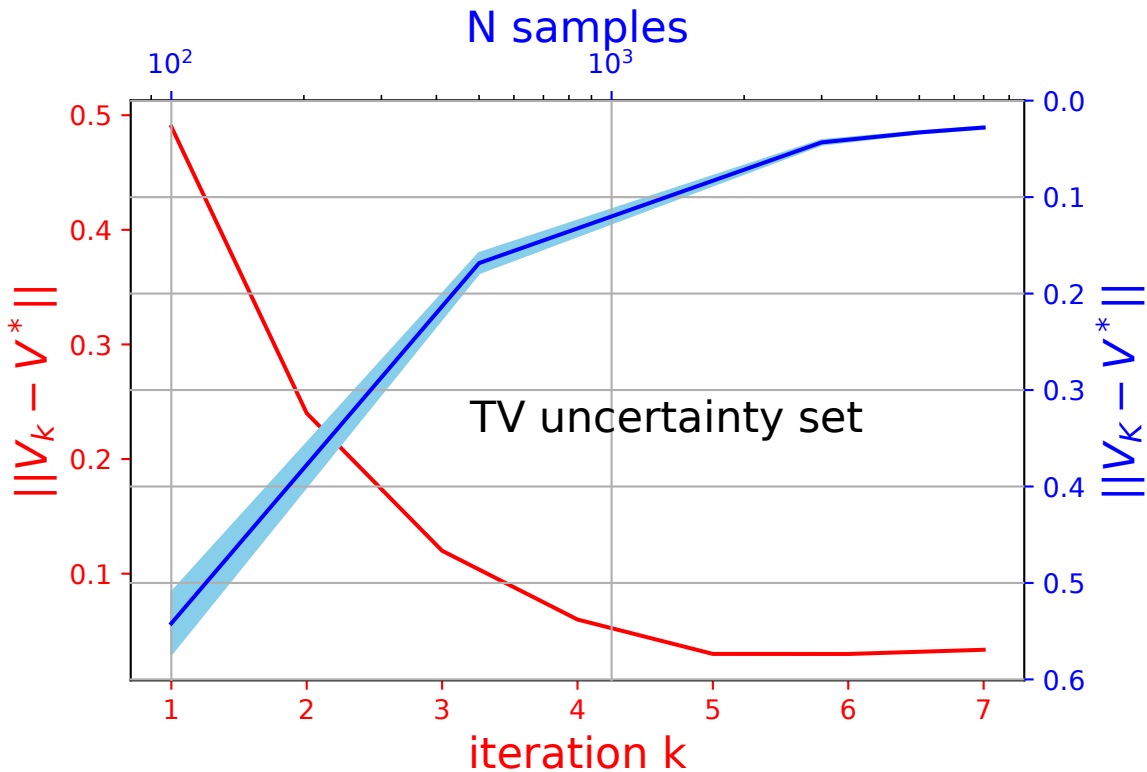

Supplement: Supplementary file 7 [file panaganti22a-supp.zip]

## TV uncertainty set

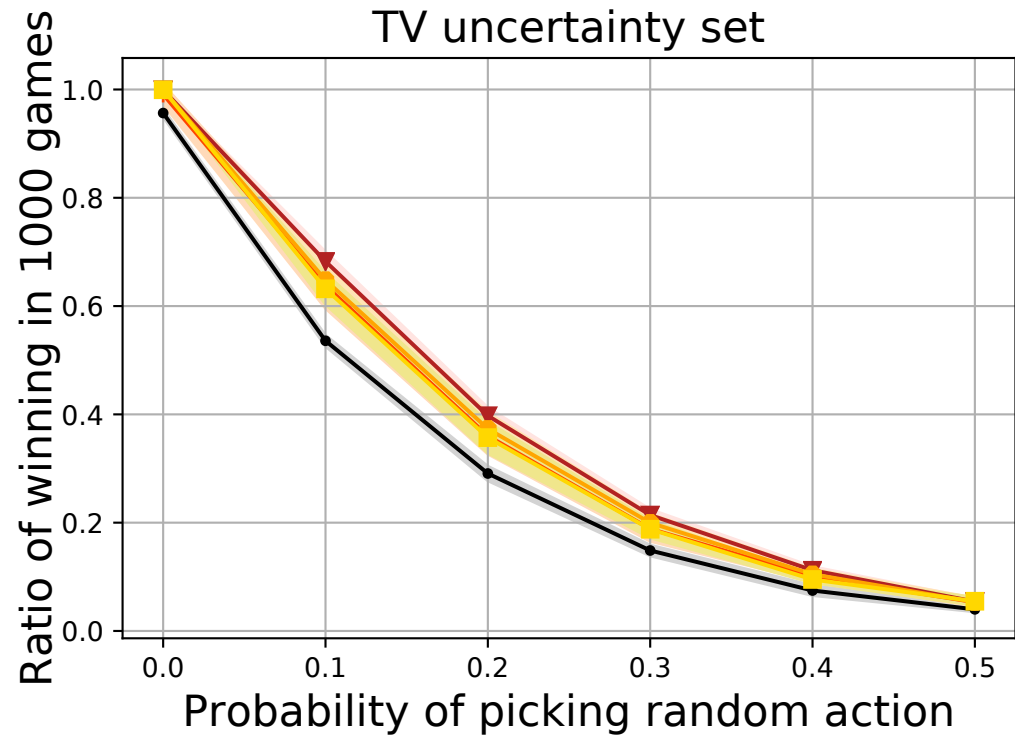

Supplement: Supplementary file 8 [file panaganti22a-supp.zip]

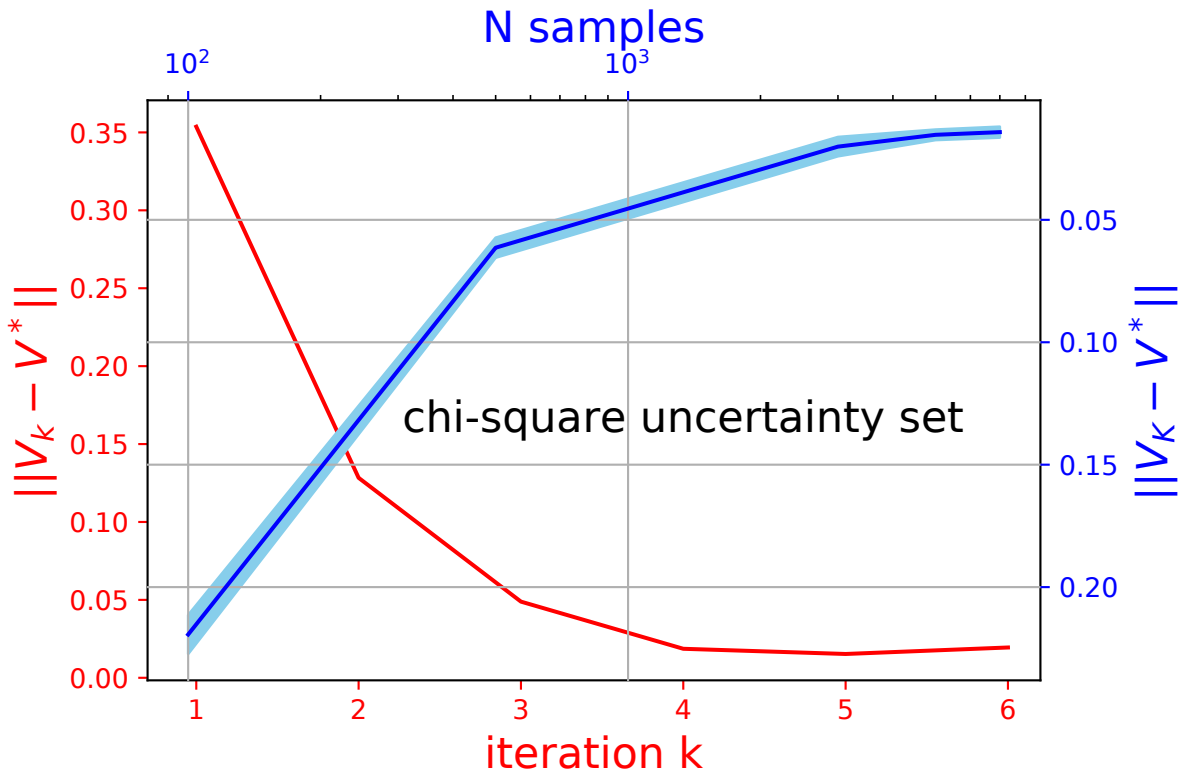

Supplement: Supplementary file 9 [file panaganti22a-supp.zip]

chi-square uncertainty set

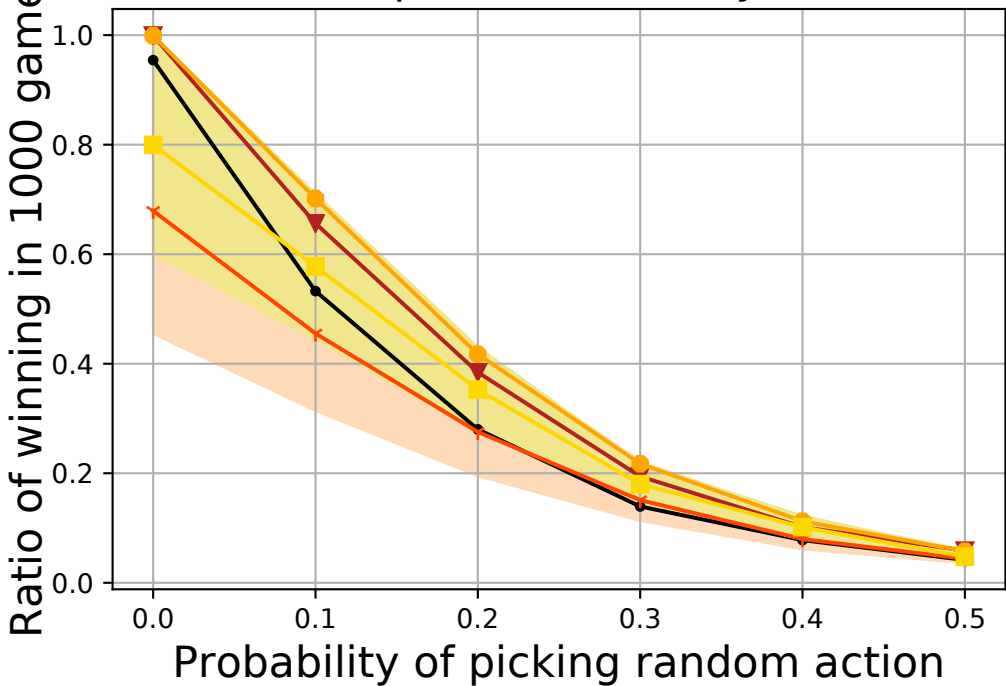

Supplement: Supplementary file 10 [file panaganti22a-supp.zip]

chi-square uncertainty set

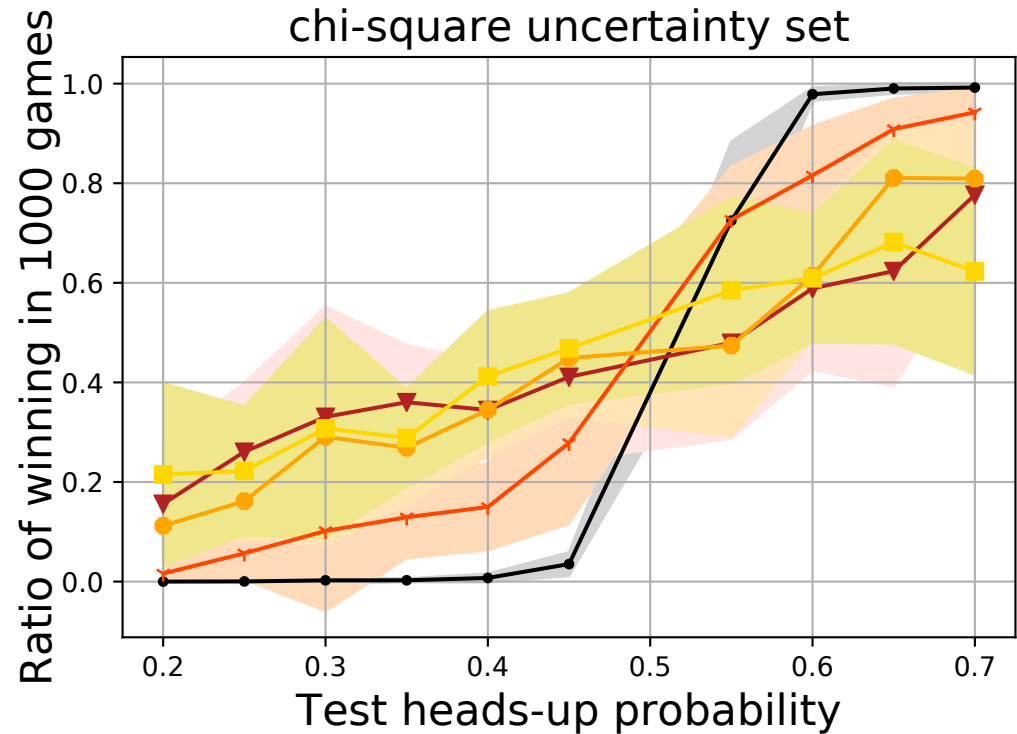

Supplement: Supplementary file 11 [file panaganti22a-supp.zip]

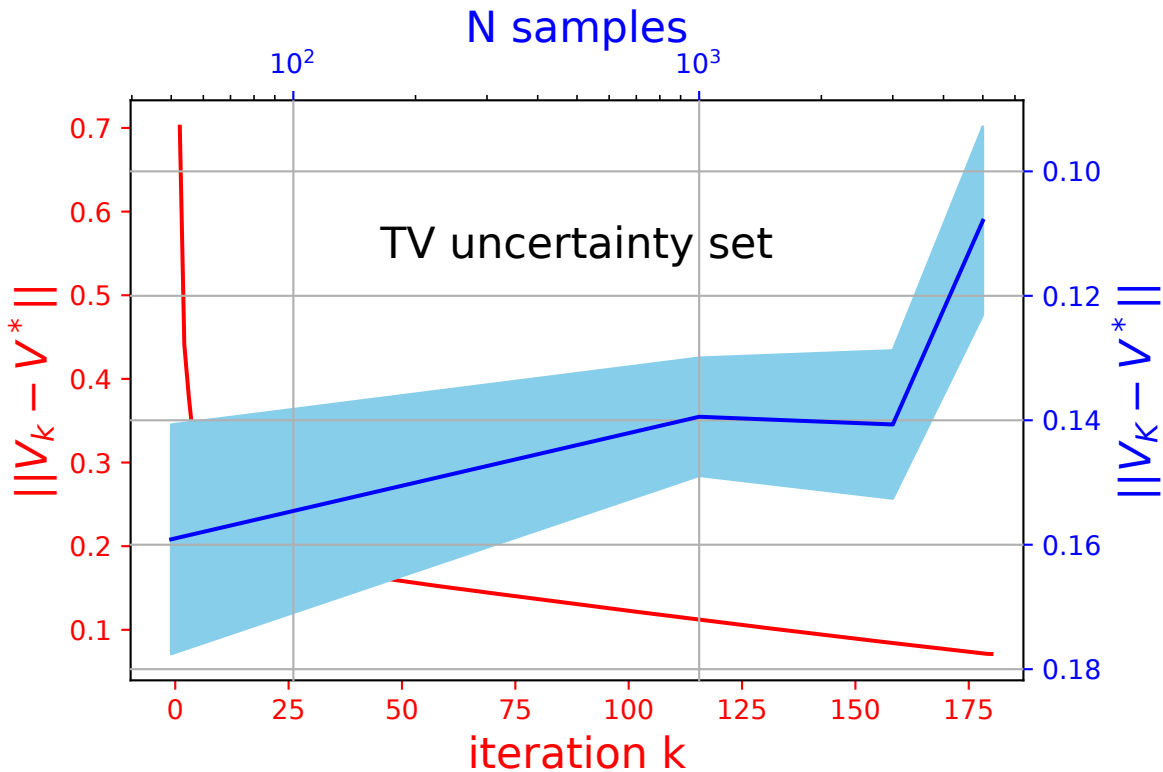

Supplement: Supplementary file 14 [file panaganti22a-supp.zip]
